# Supplementary material for: One Health Landscape in Sub-Saharan African Countries
Source: Preprints.org preprint supplement (doi:10.20944/preprints202009.0453.v1), 2020-09-19
Supplement: Supplementary file 1 [file supplementary]

## Appendix 1. Relevant materials and useful One Health Initiatives

| Name OH initiative                                                                                                                           | Type of initiative                           | Coverage    | Country(ies)                                 | 1° field | 2° field | 3° field       | Others (list if any) |
|----------------------------------------------------------------------------------------------------------------------------------------------|----------------------------------------------|-------------|----------------------------------------------|----------|----------|----------------|----------------------|
| One Health Rapid Response Team (OHRRT)                                                                                                       | Organization & Implementation                | National    | Tanzania                                     | PH       | AH       | EH             | Welfare, AMR         |
| One Health Coordination Desk (OHCD)                                                                                                          | Coordination                                 | National    | Tanzania                                     | PH       | AH       | EH             | Welfare, AMR         |
| Zoonotic Disease Unit (ZDU)                                                                                                                  | Coordination, Organization & Implementation  | National    | Kenya                                        | PH       | AH       | EH             | AMR, welfare         |
| Southern African Centre for Infectious Disease Surveillance (SACIDS) Foundation for One Health                                               | Multipurpose                                 | Regional    | Southern & East Africa                       | PH       | AH       | EH             | AMR                  |
| One Health Central and Eastern Africa (OHCEA) (linked with OHW) (Cameroon, DRC (Congo), Ethiopia, Kenya, Uganda, Rwanda, Tanzania, Senegal). | Capacity development, organization           | Regional    | East & Central Africa                        | AH       | PH       | EH             | Welfare, AMR         |
| Africa One Health University Network (AFROHUN), Formerly OHCEA (linked with OHWNG)                                                           | Capacity development, organization, research | Continental | East & Central Africa                        | AH       | PH       | EH             | Welfare, AMR         |
| RESPOND Project                                                                                                                              | Capacity development                         | Regional    | Congo, Uganda                                | AH       | PH       | EH             | Welfare,             |
| One Health Systems Mapping and Analysis Resource Toolkit (OH-SMART)                                                                          | Tool                                         | Global      | World                                        | PH       | AH       | AMR            | EH                   |
| One Health Workforce (OHW) (Comprised of OHCEA & SOHUN - Southeast Asia One Health University Network)                                       | Capacity development, Research               | Global      | East & Central Africa                        | AH       | PH       | EH             | Welfare, AMR         |
| One Health Workforce - Next Generation (OHWNG)                                                                                               | Capacity development, organization, Research | Global      | East & Central Africa                        | AH       | PH       | EH             | Welfare, AMR         |
| One Health Regional Network (HORN) for the Horn of Africa                                                                                    | Capacity building, Research                  | Regional    | Kenya, Ethiopia, Djibouti, Eritrea & Somalia | AH       | PH       | Social Science | Welfare              |
| One Health Development Initiative (OHDi)                                                                                                     | capacity development, Research               | Nigeria     | Nigeria                                      | AH       | PH       | EH             | AMR                  |

|                                                                                                                                                                                                     |                            |             |                        |    |    |     |      |
|-----------------------------------------------------------------------------------------------------------------------------------------------------------------------------------------------------|----------------------------|-------------|------------------------|----|----|-----|------|
| Africa Centres for Disease Control and Prevention (Africa CDC)                                                                                                                                      | Multipurpose               | Continental | All African countries  | PH | AH | EH  | AMR  |
| Afrique One Alliance. African Science Partnership for Intervention Research Excellence (Afrique One-ASPIRE). One Health initiative - African Research Consortium on Ecosystem and population health | Multipurpose               | Continental | 14 African countries   | PH | AH | AMR | EH   |
| One Health National Network for enhanced Research in Infectious Diseases (NRN-Biomed)                                                                                                               | NA                         | Global      | NA                     | PH | AH |     |      |
| Cysticercosis Working Group in Eastern and Southern Africa (CWGESA)                                                                                                                                 | Research, implementation   | Regional    | East & Southern Africa | PH | AH | EH  |      |
| Southern African Development Transboundary Animal Diseases (SADC TADs)                                                                                                                              | Organization, Coordination | Regional    | East & Southern Africa | PH | AH | EH  | TADs |
| Training Health Researchers into Vocational Excellence (THRIVE)                                                                                                                                     | Capacity development       | Global      | NA                     | PH |    |     |      |
| Consortium for Advanced Research Training in Africa (CARTA)                                                                                                                                         |                            | Continental | NA                     | PH |    |     |      |
| Ecole inter-Etats des Sciences et Medecine Veterinaires (EISMV)                                                                                                                                     | Capacity development       | Regional    | West & Central Africa  | PH | AH | EH  | AMR  |
| Jimma University One Health Students' Innovation Club (OHSIC)                                                                                                                                       | Capacity development       | National    | Ethiopia               | PH | AH | EH  | AMR  |
| Mekelle University Students One Health Innovation Club (SOHIC)                                                                                                                                      | Capacity development       | National    | Ethiopia               | PH | AH | EH  | AMR  |
| Makerere University Student One Health Innovation Club (SOHIC)                                                                                                                                      | Capacity development       | National    | Uganda                 | PH | AH | EH  | AMR  |
| Universite des Montagnes One Health Students' Club                                                                                                                                                  | Capacity development       | National    | Cameroon               | PH | AH | EH  | AMR  |

|                                                                                                    |                                               |             |                              |    |    |    |                        |
|----------------------------------------------------------------------------------------------------|-----------------------------------------------|-------------|------------------------------|----|----|----|------------------------|
| Moi University One Health Students' Club.                                                          | Capacity development                          | National    | Kenya                        | PH | AH | EH | AMR                    |
| Muhimbili University of Health and Allied Sciences One Health Students' Club.                      | Capacity development                          | National    | Tanzania                     | PH | AH | EH | AMR                    |
| Sokoine University of Agriculture One Health Students' Club.                                       | Capacity development                          | National    | Tanzania                     | AH | PH | EH | AMR                    |
| University of Rwanda One Health Students' Club.                                                    | Capacity development                          | National    | Rwanda                       | PH | AH | EH | AMR                    |
| University of Addis Ababa                                                                          | Capacity development                          | National    | Ethiopia                     | PH | AH | EH | AMR                    |
| University of Buea, Faculty of Health Sciences, and Faculty of Agriculture and Veterinary sciences | Capacity development                          | National    | Cameroon                     | PH | AH | EH | AMR                    |
| University of Kinshasa, the school of Public Health                                                | Capacity development                          | National    | Democratic Republic of Congo | PH | AH | EH | AMR                    |
| University of Lubumbashi, the Faculty of Veterinary Medicine                                       | Capacity development                          | National    | Democratic Republic of Congo | PH | AH | EH | AMR                    |
| University of Nairobi, Faculty of Veterinary Medicine and School of Public Health                  | Capacity development                          | National    | Kenya                        | PH | AH | EH | AMR                    |
| Stellenbosch University, Medical School                                                            | Capacity development                          | National    | South Africa                 | PH | AH | EH | AMR                    |
| University of Ibadan, Nigeria                                                                      | Capacity development, coordination & research | National    | Nigeria                      | AH | PH | EH | AMR                    |
| University Nangui Abrogoua                                                                         | Capacity development                          | National    | Ivory Coast                  | PH | AH | EH | AMR                    |
| University of Pretoria, Faculty of Veterinary Science                                              | Capacity development                          | National    | South Africa                 | PH | AH | EH | AMR, welfare, wildlife |
| South Africa Regional Global Disease Detection Center                                              | Capacity development, research                | Regional    | South Africa                 | PH | AH | EH | AMR                    |
| PREDICT consortium-One Health Institute                                                            | Capacity development, research                | Global      | Tanzania                     | PH | AH | EH |                        |
| African Field Epidemiology Network (AFENET) & FELTP                                                | Capacity development & research               | Continental | All African countries        | PH | AH | EH | Welfare,               |

|                                                                                       |                                                 |          |                              |    |     |     |                            |
|---------------------------------------------------------------------------------------|-------------------------------------------------|----------|------------------------------|----|-----|-----|----------------------------|
| University of Zambia, Schools of Medicine and Veterinary Medicine                     |                                                 | National | Zambia                       | AH | PH  | EH  | AMR, Welfare               |
| Central Veterinary Research Institute                                                 | Research, implementation                        | National | Zambia                       | AH | PH  | EH  | AMR                        |
| The Centre for Environmental Stewardship (CES)                                        | Capacity development and research               | National | Kenya                        | EH |     |     |                            |
| Centre Suisse de Recherches Scientifiques en Directorate of Animal Science            | Research & Capacity development                 | National | Ivory Coast                  | AH | EH  | PH  | Risk analysis, food safety |
| Institute of Agricultural Research of Mozambique - Ministry of Agriculture            | Implementation                                  | National | Mozambique                   | AH | AMR | EH  | Welfare, PH                |
| Eduardo Mondlane University                                                           | Capacity development and research               | National | Mozambique                   | AH | PH  | EH  | AMR, Welfare               |
| Ifakara Health Institute (IHI)                                                        | Capacity development and research               | National | Tanzania                     | PH | AMR | EH  | AH                         |
| Institut de Recherche en Elevage pour le Development                                  | Research & Capacity development                 | National | Chad                         | PH | AH  |     |                            |
| National Health Institute - Ministry of Health (NHI)                                  | Multipurpose                                    | National | Mozambique                   | PH | AH  |     |                            |
| National Institute of Biomedical Research (NIBR)                                      | Research & Capacity development                 | National | Democratic Republic of Congo | PH | AH  |     |                            |
| National Institute for Communicable Diseases, National Laboratory Services (NICD NLS) | Research & Capacity development                 | National | South Africa                 | PH | AH  | EH  | AMR                        |
| National Institute for Fisheries Inspection (INIP)                                    | Research & Capacity development                 | National | Mozambique                   | EH | AH  | PH  | Food safety                |
| National Institute for Nature Conservation (NINC)                                     | Research & Capacity development                 | National | Democratic Republic of Congo | EH | PH  | AH  | Welfare,                   |
| Naguchi Memorial Institute of Medical Research (NMIMR)                                | Research & Capacity development                 | National | Ghana                        | PH | AH  | EH  | Welfare,                   |
| Tanzania Wildlife Research Institute (TAWIRI)                                         | Research & Capacity development                 | National | Tanzania                     | EH | AH  | PH  | Ecology                    |
| The Tanzania Veterinary Laboratory Agency, Central Veterinary Laboratory (TVLA)       | Research, implementation & Capacity development | National | Tanzania                     | AH | EH  | AMR | PH                         |

|                                                                             |                                                       |          |                              |    |    |     |          |
|-----------------------------------------------------------------------------|-------------------------------------------------------|----------|------------------------------|----|----|-----|----------|
| The Central Veterinary Laboratory in Kinshasa                               | Research & Capacity development                       | National | Democratic Republic of Congo | AH | EH | AMR | PH       |
| National Institute for Medical Research (NIMR)                              | Research & Capacity development                       | National | Tanzania                     | PH | AH | AMR | EH       |
| Tropical Diseases Research Centre (TDRC)                                    | Research & Capacity development                       | National | Zambia                       | PH | AH | EH  | Welfare, |
| International Centre for Insect Physiology and Ecology (ICIPE)              | Research & Capacity development                       | Regional | Kenya, Tanzania              | EH | AH | PH  |          |
| Zoonotic and Emerging Diseases Group                                        | Research & Capacity development                       | Regional | East Africa                  | AH | PH | EH  | AMR      |
| Kenya Medical Research Institute (KEMRI)                                    | Research & Capacity development                       | National | Kenya                        | PH | AH | EH  |          |
| One Health Resource Centre                                                  | Implementation                                        | National | Kenya                        | PH | AH |     |          |
| Touch Foundation                                                            | Organization                                          | National | Tanzania                     | PH |    |     |          |
| National One Health Steering Committee (MoH, MoLF, MoCT, MoFTCC (zoonosis)) | Coordination                                          | National | Ethiopia                     | PH | AH | EH  | AMR      |
| MoH, MoLF, MoCT, MoFTCC (zoonosis)                                          | Implementation                                        | National | Ethiopia                     | PH | AH | EH  | AMR      |
| One Health Desk, ILRI                                                       | Research & Capacity development                       | Global   | East Africa                  | AH | PH | EH  | AMR      |
| National Public Health Institute/ One Health Desk                           | Multipurpose                                          | National | Liberia                      | PH | AH | EH  |          |
| National Directorate of Veterinary Services                                 | Multipurpose                                          | National | Mali                         | AH | PH | EH  | Welfare, |
| University of Free State, ARC-OVR, GDARD joint initiative                   | Research & Capacity development                       | National | South Africa                 | PH | AH | EH  | Welfare, |
| One Health Innovative student's club                                        | Capacity development                                  | National | Uganda                       | PH | AH | EH  | AMR      |
| Global Alliance for Rabies Control (GARC)                                   | Implementation, Research, organization & coordination | Global   | World                        | AH | PH | EH  |          |
| Mission Rabies (MR)                                                         | Implementation, Research, organization & coordination | Global   | World                        | AH | PH | EH  | Welfare  |
| Mbwa wa Africa                                                              | Implementation, Research, organization & coordination | National | Tanzania                     | AH | PH | EH  | Welfare  |

|                                                                                                                                                          |                                                 |          |              |     |    |     |              |
|----------------------------------------------------------------------------------------------------------------------------------------------------------|-------------------------------------------------|----------|--------------|-----|----|-----|--------------|
| Global One Health Initiative, Ohio State University                                                                                                      | Research & Capacity development                 | Global   | World        | AH  | PH | EH  | AMR          |
| OH Institute, University of California Davis                                                                                                             | Research & Capacity development                 | Global   | World        | AH  | PH | EH  | AMR          |
| EcoHealth Alliance                                                                                                                                       | Research & Capacity development                 | Global   | World        | EH  | AH | PH  | AMR          |
| Rwanda Institute for Conservation Agriculture (RICA)                                                                                                     | Research & Capacity development                 | National | Rwanda       | PH  | AH | EH  | Welfare,     |
| African Institute for One Health Research and Diagnostics                                                                                                | Research, implementation & Capacity development | National | Nigeria      | AH  | PH | EH  |              |
| University of Global Health Equity                                                                                                                       | Research & Capacity development                 | National | Rwanda       | PH  | AH | EH  | AMR          |
| University of Ilorin Students' One Health Initiative (UNILOSOHI)                                                                                         | Capacity development                            | National | Nigeria      | PH  | AH | EH  | AMR          |
| University of Edinburgh MSc One Health programme (with scholarship)                                                                                      | Research & Capacity development                 | Global   | World        | AH  | PH | EH  | AMR          |
| Transdisciplinary Consultants                                                                                                                            | Implementation                                  | National | Kenya        | AH  | PH | EH  | Welfare, AMR |
| Action Plan Guide towards slowing down rising AMR trends and their attendant impact. (Global initiative)                                                 | Coordination, implementation                    | National | Nigeria      | PH  | AH | EH  | Welfare,     |
| Global Antibiotics Research and Development Partnership (GARDP)                                                                                          | Coordination, Organization & Implementation     | Global   | World        | PH  | AH | AMR | EH           |
| National Action Plans (NAP) on AMR and National Policy on AMR                                                                                            | Tool, coordination & organization               | Global   | World        | PH  | AH | EH  | AMR          |
| Centre for Disease Dynamics Economics and Policy (CDDEP)                                                                                                 | Organization, implementation, research          | Global   | World        | AMR | PH | AH  | EH           |
| Antibiotic Guardian: South Africa                                                                                                                        | organization, coordination, implementation      | National | South Africa | AMR | PH | AH  | EH           |
| Development of National AMR surveillance plan (NAMRSP). Prioritization of micro-organisms for reporting and linked to National Reference laboratory with | Coordination, implementation                    | National | Ethiopia     | AMR | PH | AH  | EH           |

|                                                                                                                                                         |                                             |          |                                                                                           |     |     |     |     |
|---------------------------------------------------------------------------------------------------------------------------------------------------------|---------------------------------------------|----------|-------------------------------------------------------------------------------------------|-----|-----|-----|-----|
| surveillance sentinel sites                                                                                                                             |                                             |          |                                                                                           |     |     |     |     |
| Training program in Epidemiology and Public Health Intervention Network (TEPHINET)                                                                      | Capacity development, research              | Global   | World                                                                                     | PH  | AH  | AMR | EH  |
| Finnish Science and Technology cooperation with Europe Africa Asia and LAC Region (FinCEAL)                                                             | Capacity development, research              | Regional | World                                                                                     | PH  | AH  | EH  |     |
| Surveillance for AMR and antibiotics consumption in South Africa                                                                                        | Coordination, implementation & organization | National | South Africa                                                                              | AMR | PH  | AH  | EH  |
| African innovators tackle AMR                                                                                                                           | Tool (grant)                                | Global   | Africa                                                                                    | AMR | PH  | AH  | EH  |
| Emergency Centre for Transboundary Animal Diseases (ECTAD): One Health, zoonosis and AMR themes                                                         | Multipurpose                                | Global   | World                                                                                     | AH  | AMR | PH  |     |
| Global One Health paradigm: Challenges and opportunities for tackling infectious diseases of human-animal-environment interface in low resource setting | Organization, coordination                  | Global   | World                                                                                     | PH  | AH  | EH  | AMR |
| GHP: Promotion of increased international collaboration especially research in infectious diseases and AMR                                              | Organization, coordination                  | Global   |                                                                                           | PH  | AH  | EH  | AMR |
| Global Antibiotics Research Partnership (GARP)                                                                                                          | Multipurpose                                | Global   | Kenya, South Africa, Mozambique, Tanzania, Uganda, Namibia, Nigeria, Seychelles, Zimbabwe | AMR | PH  | AH  | EH  |
| World Alliance Against Antibiotics Resistance (WAAAR): A major player in global drive to protect human health.                                          | Multipurpose                                | Global   | World                                                                                     | AMR | PH  | AH  | EH  |

|                                                                                                                                                                             |                                                                   |             |                           |    |               |                   |          |
|-----------------------------------------------------------------------------------------------------------------------------------------------------------------------------|-------------------------------------------------------------------|-------------|---------------------------|----|---------------|-------------------|----------|
| One Health - One health approaches for health, disaster risk reduction                                                                                                      | Coordination & organization                                       | Regional    | NA                        | PH | AH            | EH                | AMR      |
| Students' One Health Innovation Club (SOHIC-CHS)                                                                                                                            | Capacity development                                              | National    | Nigeria                   | PH | AH            | EH                | AMR      |
| Ecohealth (ILRI) - Effective management of of elimination of livestock zoonotic and food-borne diseases that matter to the poor                                             | Implementation, Research, organization & coordination             | National    | Kenya                     | PH | AH            | EH                |          |
| Ecohealth - Identification of Anthrax hotspots and associated ecological factors predicting infections and exposure risk in Kenya                                           | Implementation, Research, organization & coordination             | National    | Kenya                     | AH | PH            | EH                |          |
| Ecohealth (ILRI) - Active surveillance to determine the prevalence of Rift Valley Fever, Brucellosis and Q-fever, and their co-infections in human, ;livestock and wildlife | Implementation, Research, organization & coordination             | National    | Kenya                     | AH | PH            | EH                | Wildlife |
| Climate change and Animal health in Africa                                                                                                                                  | Research, organization                                            | Continental | Continental               | EH | AH            | PH                | Wildlife |
| African Livestock Productivity and Health Advancement (ALPHA) Initiative                                                                                                    | Implementation                                                    | Continental | Nigeria, Ethiopia, Uganda | AH | Food security | Animal production | Welfare, |
| Livestock production and Animal health management system in communal farming areas at the wildlife-livestock interface in South Africa                                      | Capacity development & research                                   | National    | South Africa              | PH | AH            | EH                | Welfare, |
| Ecohealth (ILRI): Approaches linking human and environmental health in Kenya                                                                                                | Capacity development & research                                   | National    | Kenya                     | PH | AH            | EH                | Welfare, |
| ILRI/BMZ One Health Research, Education, Outreach and Awareness Centre (OHRECA)                                                                                             | Coordination, organization, capacity development & Implementation | Continental | All African countries     | PH | AH            | Food safety       | AMR      |



|                                                                                                              |                                               |             |                          |    |             |             |                   |
|--------------------------------------------------------------------------------------------------------------|-----------------------------------------------|-------------|--------------------------|----|-------------|-------------|-------------------|
| The One Health Units for Humans, Environment, Animals and Livelihoods (HEALS) project                        | Capacity development & implementation         | Regional    | Ethiopia, Somalia, Kenya | AH | PH          | EH          | AMR, Welfare      |
| SELIP                                                                                                        |                                               |             |                          |    |             |             |                   |
| Health of Ethiopian Animals for Rural Development (HEARD)                                                    | Capacity development & implementation         | National    | Ethiopia                 | AH | Food safety | EH          | PH                |
| Wildlife Conservation Society                                                                                | Coordination, implementation, research        | Global      | World                    | EH | AH          | PH          | Welfare, wildlife |
| Conservation through Public Health in Uganda                                                                 | Coordination, implementation                  | National    | Uganda                   | EH | PH          | AH          | Welfare,          |
| One Health: Connecting Humans, Animals and the Environment                                                   | Capacity development                          | Global      | World                    | PH | AH          | AMR         | EH                |
| Specialized Master in Integrated Management of Health Risks in the Global South (IManHR)                     | Capacity development & implementation         | Global      | All African countries    | PH | AH          | EH          | AMR               |
| Taking a Multisectoral, One Health Approach: A Tripartite Guide to Addressing Zoonotic Diseases in Countries | Coordination & organization                   | Global      | World                    | PH | AH          | EH          | AMR               |
| One Health Global Network (OHGN)                                                                             | Organization, research & capacity development | Global      | World                    | PH | AH          | AMR         | Food safety       |
| Global Risk Forum Davos One Health                                                                           | Organization, research & capacity development | Global      | World                    | PH | AH          | Food safety | AMR               |
| Environmental Health Perspectives: Fall in fish catch threatens human health                                 | Research                                      | Continental | Africa                   | PH | AH          | EH          |                   |
| Madagascar Health and Environmental Research (MAHERY)                                                        | Research and capacity development             | National    | Madagascar               | PH | EH          | AH          | Animal production |
| Environmental Health Perspectives: Estimated effects of future atmospheric                                   | Research                                      | Regional    | North Africa             | EH | PH          |             |                   |

|                                                                                                                  |                                               |             |                                |    |    |          |                     |
|------------------------------------------------------------------------------------------------------------------|-----------------------------------------------|-------------|--------------------------------|----|----|----------|---------------------|
| CO2 concentration on protein intake                                                                              |                                               |             |                                |    |    |          |                     |
| Geohealth: Potential rise in Iron deficiency due to future anthropogenic CO2 emission                            | Research                                      | Continental | Africa                         | EH | PH |          |                     |
| WASH (Water Sanitation and Hygiene): Freshwater conservation, improved livestock farming and restoration efforts |                                               | National    | South Africa                   | PH | AH |          | interdisciplinary   |
| One Health profile of a community at the wildlife-domestic Animal interface, Mpumalanga, South Africa            | Research & Capacity development               | National    | South Africa                   | AH | PH | EH       | AMR                 |
| A One Health approach to transfrontier conservation - The Limpopo TFCA                                           |                                               | Regional    | Southern Africa                | AH | PH | EH       | Land use and policy |
| One Health Zoonotic Disease Prioritization (OHZDP)                                                               | Tool, Capacity development                    | Global      | World                          | PH | AH | Zoonoses |                     |
| Ontario Ministry of Agriculture, Food and Rural Affairs (OMAFRA) Disease Prioritization tool                     | Tool, Capacity development                    | Global      | World                          | PH | AH | AMR      |                     |
| Network for Evaluation of One Health (NEOH)                                                                      | Tool, capacity development                    | Global      | World                          | PH | AH | AMR      | EH                  |
| AVENIR Health: One Health Tool                                                                                   | Tool                                          | Regional    | East, West and Southern Africa | PH |    |          |                     |
| AWF (African Wildlife Foundation): Conservation and Environmental protection                                     | Organization, research & capacity development | Continental | Africa                         | EH | AH | PH       | Conservation        |
| ONE HEALTH: Basics of multisectoral collaboration at the Human - Animal - Environment interface                  | Capacity development                          | Global      | World                          | PH | AH | EH       | AMR                 |
| Pan African Tsetse and Trypanosomiasis Eradication Campaign                                                      | Organization, coordination, implementation    | Continental | Africa                         | PH | AH | EH       |                     |

|                                                                  |                                            |             |                                                        |                |                  |                            |                          |
|------------------------------------------------------------------|--------------------------------------------|-------------|--------------------------------------------------------|----------------|------------------|----------------------------|--------------------------|
| Coordinating Office for the Control of Trypanosomiasis in Uganda | implementation, coordination               | National    | Uganda                                                 | AH             | PH               | EH                         |                          |
| One Health Training Manual                                       | Organization, capacity development         | National    | Tanzania                                               | PH             | AH               | EH                         | Wildlife, AMR            |
| One Health Commission                                            | Capacity development, organization         | Global      | World                                                  | PH/AH          | EH               | AMR                        | Food safety              |
| One Health Strategic Plan                                        | Multipurpose                               | Continental | NA                                                     | PH             | AH               | EH                         | Wildlife                 |
| Global Health at the Human-Animal-Ecosystem Interface            | Capacity development                       | Global      | World                                                  | Global Health  | Zoonoses         | EID                        | AMR, PH                  |
| Swiss Tropical and Public Health Institute                       | Capacity development & research            | Regional    | West & Central Africa                                  | PH             | AH               | EH                         |                          |
| One Health Antibiotic Stewardship/AMR                            | Capacity development                       | Global      | World                                                  | AMR            | AH               | PH                         | EH                       |
| One Health Research Foundation                                   | Capacity development & research            | Global      | RUSVM, St. Kitts & Neves & tropical countries globally | AH             | PH               | EH                         | AMR                      |
| One Health Foundation                                            | Implementation                             | Global      | NA                                                     | AH             | PH               | Animal welfare             |                          |
| One Health Social Sciences (OHSS) Webinar                        | Capacity development & tool                | Global      | World                                                  | PH             | AH               | EH                         | Wildlife, AMR            |
| One Health capacity building in sub-Saharan Africa               | Research                                   | Continental | All African countries                                  | AH             | PH               | EH                         | AMR                      |
| One Welfare                                                      | Organization, Coordination, Implementation | Global      | World                                                  | Animal Welfare | Human well being | EH                         |                          |
| One Health Platform                                              | Organization, capacity development         | Global      | World                                                  | PH             | AH               | AMAR (Agents & resistance) | Science Policy interface |

*# Note that details of these initiatives are available in the database link provided. It should be understood that the field of One Health, One Medicine, Conservation Health and Global Health and their variants are constantly evolving, hence the list provided in this table is not exclusive*

## Appendix 2: Definition of Concepts and Key Search Items

| Term and acronym                   | Definition                                                                                                                                                                                                                                                                                                                                                                                             |
|------------------------------------|--------------------------------------------------------------------------------------------------------------------------------------------------------------------------------------------------------------------------------------------------------------------------------------------------------------------------------------------------------------------------------------------------------|
| One medicine                       | The concept whereby human and animal healthcare advances hand in hand with veterinarians, physicians and researchers collaborating to ensure that all humans and animals benefit from sustainable and equal medical progress but not at the expense of an animal's life <sup>a</sup> .                                                                                                                 |
| Zoonosis                           | Any disease or infection that is naturally transmissible from vertebrate animals to humans <sup>b</sup> . (anthropozoonosis human-animal, zooanthroponosis animal-human). It may be direct or indirect transmission                                                                                                                                                                                    |
| Human-Animal-environment interface | Complex and dynamic interactions involving human and non-human species as well as the environment. They can include the actual geographical location or virtual space where such interactions occur <sup>c</sup> .                                                                                                                                                                                     |
| Antimicrobial resistance (AMR)     | Antimicrobial resistance is the ability of microorganisms such as bacteria, fungi or protozoans to grow despite exposure to antimicrobial substances designed to inhibit their growth <sup>d</sup> .                                                                                                                                                                                                   |
| Global health (GH)                 | A study, research, and practice that places a priority on improving health and achieving health equity for all people worldwide. They are health issues that transcend national boundaries and governments and call for actions on the global forces that determine the health of people <sup>e</sup> .                                                                                                |
| Surveillance                       | The process of systematically collecting, consolidating, analyzing, and evaluating pertinent data, as well as disseminating results to relevant actors <sup>f</sup> .                                                                                                                                                                                                                                  |
| One Health**                       | This is described as either a narrow approach primarily combining public health and veterinary medicine or as a wide approach as in the widespread "umbrella" depiction including both scientific fields, core concepts, and interdisciplinary research areas <sup>g</sup> .                                                                                                                           |
| Ecohealth                          | Synonymous with biodiversity, it is an approach that emphasizes the need to protect all living creatures, implying that parasites, unicellular organisms, and possibly viruses have a value and should be protected <sup>g</sup> .                                                                                                                                                                     |
| Planetary health                   | The goal or process of achieving the highest attainable standard of health, wellbeing, and equity worldwide through judicious attention to the Human —political, economic, and social— systems that shape the future of humanity and the Earth's natural systems. It aims at defining the safe environmental limits within which humanity can flourish <sup>h</sup> .                                  |
| International health               | Also called geographic medicine, international medicine, or global health, it is a field of health care, usually with a public health emphasis, dealing with health across regional or national boundaries <sup>i</sup> .                                                                                                                                                                              |
| Environment health                 | The science and practice of preventing human injury and illness while promoting well-being through the identification and evaluation of environmental sources and hazardous agents. It focuses on limiting exposures to hazardous physical, chemical, and biological agents in air, water, soil, food, and other environmental media or settings that may adversely affect human health <sup>j</sup> . |
| Conservation medicine              | Also known as ecological health or conservation health. It works together with other disciplines in the field of disease and conservation to create healthier ecosystems, recognise and treat diseases that cross the human-animal (wildlife and domestic) barrier, prevent outbreaks of these diseases and better understand how our natural environment is inter-dependent <sup>k</sup> .            |

|                     |                                                                                                                                                                                                                                                                                                                                                                                                                                                                                                                                                                      |
|---------------------|----------------------------------------------------------------------------------------------------------------------------------------------------------------------------------------------------------------------------------------------------------------------------------------------------------------------------------------------------------------------------------------------------------------------------------------------------------------------------------------------------------------------------------------------------------------------|
| Public health       | The medical branch that aims at protecting the safety and improving the health of communities through education, policy making and research for disease and injury prevention. It promotes the health of people and the communities where they live, learn, work and play <sup>l</sup> .                                                                                                                                                                                                                                                                             |
| Tropical medicine   | An interdisciplinary branch of medicine that deals with health issues that occur uniquely, are more widespread, or are more difficult to control in tropical and subtropical regions <sup>m</sup> .                                                                                                                                                                                                                                                                                                                                                                  |
| Reductionism        | Analyzing and describing a complex and/or dynamic (changing) phenomenon in terms of one (or a few) simple and/or static indicators, while interactions are ignored. It leads to erroneous inferences and omissions. One example is binary thinking, whereby the answer to a problem is limited (reduced) to just two alternatives when, in fact, more than two alternatives exist: the phrase 'it is either black or white' ignores red, green, blue and many other colors <sup>n</sup> .                                                                            |
| Interdisciplinarity | The process by which many fields of knowledge are integrated and new knowledge is created to solve a specific problem –which may have a suboptimal or self-defeating solution if a single discipline is considered. It differs from multidisciplinary, in which several fields may participate but no integration and no new knowledge is created. While interdisciplinarity investigates the problem before the solution is created, multidisciplinary (as well as reductionism) chooses the solution before the nature of the problem is identified <sup>n</sup> . |
| Brain storming      | An educational strategy used to both demonstrate knowledge gaps in any one field, later addressed by the dialogue generated by a group of people trained in several fields. It aims at constructing, deconstructing, and reconstructing knowledge by, first, revealing the limitations of unidisciplinary reductionism and, second, fostering novel (and problem-specific) solutions that include but exceed any one field.                                                                                                                                          |

<sup>a</sup> Humanimal Trust. One Medicine. Available at: <http://www.humanimaltrust.org.uk/what-is-one-medicine/>. Accessed 27 April 2020; <sup>b</sup> World Health Organization (2020). Zoonosis. Available at: <https://www.who.int/topics/zoonoses/en/>. Accessed 27 April 2020; <sup>c</sup> Authors' definition; <sup>d</sup> Nature. Antimicrobial resistance. Available at: <https://www.nature.com/subjects/antimicrobial-resistance>. Accessed 27 April 2020; <sup>e</sup> Koplan JP, Bond TC, Merson MH, Reddy KS, Rodriguez MH, Sewankambo NK, et al. Towards a common definition of global health. *Lancet*. 2009;373:1993–1995; & Kickbush I. The need for a European strategy on global health. *Scand J Public Health*. 2006;34:561–565; <sup>f</sup> Heymann DL. (2008). *Control of communicable diseases manual*, 19th edition. Washington, DC: American Public Health Association; <sup>g</sup> Lerner H, Berg C. A Comparison of Three Holistic Approaches to Health: One Health, EcoHealth, and Planetary Health, *Frontiers in Veterinary Science*, 2017; doi: 10.3389/fvets.2017.00163; <sup>h</sup> Horton R, Lo S. Planetary health: a new science for exceptional action. *The Lancet*, 2015; 386: 1921 – 1922, [http://dx.doi.org/10.1016/S0140-6736\(15\)61038-8](http://dx.doi.org/10.1016/S0140-6736(15)61038-8); <sup>i</sup> Wikipedia. International Health. Available at: [https://en.wikipedia.org/wiki/International\\_health](https://en.wikipedia.org/wiki/International_health). Accessed 29 April 2020; <sup>j</sup> National Environmental Health Association (2020). Definitions of Environmental Health. Available at: <https://www.neha.org/about-neha/definitions-environmental-health>. Accessed 29 April 2020; <sup>k</sup> World Extreme Medicine Academy (2020). Conservation Medicine. Available at: <https://worldextrememedicine.com/blog/2018/06/what-is-conservation-medicine/>. Accessed 29 April 2020; <sup>l</sup> American Public Health Association & University of Pittsburgh Graduate School of Public Health (2020). Public Health. Available at: <https://www.apha.org/what-is-public-health> & <https://www.publichealth.pitt.edu/careers/what-is-public-health>. Accessed 29 April 2020; <sup>m</sup> Wikipedia. Tropical Medicine. Available at: [https://en.wikipedia.org/wiki/Tropical\\_medicine](https://en.wikipedia.org/wiki/Tropical_medicine). Accessed 29 April 2020; <sup>n</sup> Hittner JB et al. The Third Cognitive Revolution: The consequences and possibilities for biomedical research *EMBO Rep* (2019)20:e47647. Doi:10.15252/embr.201847647

### Appendix 3. Specific Strengths, weaknesses, opportunities and threats (SWOT) in One Health in Sub-Saharan Africa

| Strengths                                                                         | Weaknesses                                                                                                             |
|-----------------------------------------------------------------------------------|------------------------------------------------------------------------------------------------------------------------|
| - Stakeholders have varied levels of responsibilities and interest                | - Lack of multi-sectoral working mechanisms to respond to disease outbreaks and weak preparedness and prevention plans |
| - Existing national and subnational zoonotic disease committees in some countries | - Poor information sharing and communication across the relevant sectors                                               |

|                                                                                                                                                                                                        |                                                                                                                                                                                      |
|--------------------------------------------------------------------------------------------------------------------------------------------------------------------------------------------------------|--------------------------------------------------------------------------------------------------------------------------------------------------------------------------------------|
| - Availability of disaster and emergency committees                                                                                                                                                    | - Poor coordination mechanism inter-sectorally                                                                                                                                       |
| - Existence of basic infrastructure and resources for research                                                                                                                                         | - Very low involvement of environmental sector in One Health initiatives                                                                                                             |
| - Proper channels for co-ordination and dissemination of information                                                                                                                                   | - Lack of skilled professionals/experts in government workforce on the One Health approach and the integration of sectoral work                                                      |
| - There is power of resource mobilization                                                                                                                                                              | - Bureaucratic barriers among the different sectors                                                                                                                                  |
| - Legislation to co-ordinate and command/enforce                                                                                                                                                       | - Lack of One Health policy and communication guidelines or strategy in many African countries. For example, Uganda has a National One Health Risk Communication Strategy            |
| - Functioning systems at each administrative level                                                                                                                                                     | - Each institution conducts research in isolation and does not regularly report back                                                                                                 |
| - Existence of research information sharing systems                                                                                                                                                    | - Insufficient multi-disciplinary research experts                                                                                                                                   |
| - Availability of experts from the different sectors                                                                                                                                                   | - National research agendas do not address One Health issues                                                                                                                         |
| - Vertical Integrated surveillance systems (national & subnational) are in place. Some also have horizontal surveillance systems (cutting across disciplines of epidemiology and the laboratories)     | - There are huge disparities and inconsistencies in the structures, platforms, mandates and institutions across SSA countries                                                        |
| - Existence of National task force committees in various sectors to respond to Public Health events including zoonotic diseases                                                                        | - Majority of the existing platforms are not institutionalized within the government system with dedicated budget and depend largely on donor funds                                  |
| - Some countries have institutionalized One Health platforms for national coordination & or implementation                                                                                             | - Lack of institutionalized memorandum of understanding to operationalize One Health, hence the sectors hold back from sharing across sectors.                                       |
| - Several institutions and countries have medical and veterinary programmes at training institutions and governmental levels                                                                           | - Lack of adequate training in areas of One Health approach and the benefits thereof.                                                                                                |
| - Some Ministries and Departments within the public, animal & environmental health have specific fund budgeted annually to support One Health issues like zoonoses, AMR, joint outbreak investigation. | - Many of the national and subnational One Health platforms are active and coordinated only during reported outbreaks                                                                |
|                                                                                                                                                                                                        | - Noticed sectoral or discipline-specific preservation and over-protection                                                                                                           |
|                                                                                                                                                                                                        | - Lack of home-grown One Health initiatives across countries                                                                                                                         |
|                                                                                                                                                                                                        | - Data collected by individual departments or sectors are most times not shared across sectors, hence integrated risk analysis is difficult                                          |
|                                                                                                                                                                                                        | - The strength and numbers of animal and environmental health facilities often does not match those of the public health thereby entrenching disparities                             |
|                                                                                                                                                                                                        | - Lack of adequately skilled human resources in many countries (many posts remained vacant) hence the current staff are overstretched and with advanced age                          |
|                                                                                                                                                                                                        | - Misconceptions leading to narrowing of the One Health approach. It is often confused as a distinct field or for zoonoses instead of broadly, notification instead of collaboration |

### Appendix 3. Specific Strengths, weaknesses, opportunities and threats (SWOT) in One Health in Sub-Saharan Africa (continued)

| Opportunities                                                                                             | Threats                                                                                                                                                      |
|-----------------------------------------------------------------------------------------------------------|--------------------------------------------------------------------------------------------------------------------------------------------------------------|
| - Presence of emerging and re-emerging zoonotic diseases (avian influenza, Ebola)                         | - Outputs of One Health research are not is not used to inform appropriate policies                                                                          |
| - Inclusion of One Health approach issues within the government sectors and University training curricula | - Several training institutions still largely operate in their traditional single line discipline training methods and not incorporating One Health approach |
| - Existence of potential development partners and local support                                           | - Improper plans for surveillance, preparedness and response                                                                                                 |
| - Activities of multi-sectoral co-ordination                                                              | - Inadequate support by policy makers                                                                                                                        |
| - Availability of surveillance system in related ministries                                               | - Reporting platforms and systems across sectors need to be similar or interoperable                                                                         |

|                                                                                                                                                                                                                                                                                                                                                                                 |                                                                                                                                                                                                                                                                                                                                     |
|---------------------------------------------------------------------------------------------------------------------------------------------------------------------------------------------------------------------------------------------------------------------------------------------------------------------------------------------------------------------------------|-------------------------------------------------------------------------------------------------------------------------------------------------------------------------------------------------------------------------------------------------------------------------------------------------------------------------------------|
| - Availability of contingency plans                                                                                                                                                                                                                                                                                                                                             | - Absence of comprehensive national One Health strategic plans in most countries                                                                                                                                                                                                                                                    |
| - Presence of political will and stability                                                                                                                                                                                                                                                                                                                                      | - Challenge in acquiring sufficient government funding                                                                                                                                                                                                                                                                              |
| - The recognized need for multi-sectoral collaboration                                                                                                                                                                                                                                                                                                                          | - Limited laboratory based diagnostic capacity which will result in poor detection of outbreaks/causative agents on time                                                                                                                                                                                                            |
| - Baseline information on One Health are existing in different collaborating Institutions but need consolidation or joint evaluation                                                                                                                                                                                                                                            | - Lack of clearly defined legislation on the engagement of public-private partnership pertinent to One Health                                                                                                                                                                                                                       |
| - Existence of external funding agencies                                                                                                                                                                                                                                                                                                                                        | - Poor economy and global economic crisis                                                                                                                                                                                                                                                                                           |
| - Interest of development partners and the changing government system in adopting new innovations or technologies                                                                                                                                                                                                                                                               | - Lack of empirical and validated population level data                                                                                                                                                                                                                                                                             |
| - Existence of different forums for policy briefing                                                                                                                                                                                                                                                                                                                             | - Lack of political good will                                                                                                                                                                                                                                                                                                       |
| - Workers are often keen to work together, however this requires guidelines for the same, for example, some Ministries cannot share information except approved by the higher authorities                                                                                                                                                                                       | - No involvement of governmental departments and broad stakeholders in trans-disciplinary research activities (mainly done by non-governmental organization and research institutes)                                                                                                                                                |
| - Other departments have proved to work collaboratively, and examples exist across SSA                                                                                                                                                                                                                                                                                          | - Insufficient co-ordination units, and insufficient funds to support the Coordination units                                                                                                                                                                                                                                        |
| - Collaborative One Health education/research are happening and many externally-funded nationally implemented projects and funders are supporting/displaying the concept of One Health                                                                                                                                                                                          | - Lack of centralized verifiable data base for existing surveillance monitoring and response system related to One Health in relevant government ministries                                                                                                                                                                         |
| - The field is opening up and nowadays multiple disciplines are working in line ministries and parastatals not traditionally theirs, e.g. veterinarians and environmentalist are in current human surveillance system                                                                                                                                                           | - No inclusion of One Health-based courses in the curriculum of human medicine, veterinary medicine and other related disciplines at the University                                                                                                                                                                                 |
| - National documents for health issues (NAPHS, OHSP, NAP for AMR, Surveillance guidelines for PZDs, Surveillance and stewardship of Antimicrobials, Disease control strategies, and country programming documents) as well as evaluative tools/reports (JEE of IHR, SET, PVS, ATLASS, Bridging workshop reports and Gap analysis) are developed or adopting One Health approach | - Lack of similar or comparable guidelines across sector, e.g. Standard treatment guidelines are lacking for the veterinary sector in most countries, biomedical waste guideline for veterinary hospitals/clinics are mostly unavailable, most medical doctors largely consider clinical approach than population medicine approach |
|                                                                                                                                                                                                                                                                                                                                                                                 | - Lack of guidelines for the use of pesticides, antimicrobials, and inclusion chemicals/preservatives in food systems                                                                                                                                                                                                               |
|                                                                                                                                                                                                                                                                                                                                                                                 | - Lack of adequate involvement of environmental/crop agriculture departments, parastatals and ministries                                                                                                                                                                                                                            |
|                                                                                                                                                                                                                                                                                                                                                                                 | - External funded projects are time bound and not easy to institutionalize                                                                                                                                                                                                                                                          |
|                                                                                                                                                                                                                                                                                                                                                                                 | - Duplication of roles and efforts hinder the implementation of One Health initiatives and the participation of ministries                                                                                                                                                                                                          |

*Adapted from Lee & Brumme, (2013); URT, (2015); Onyango et al., (2019)*

#### Appendix 4: Sample relationship between One Health related organizations, Kenya

|                         |                     | Livestock                                                                                                                    | Public Health                                                | Environment                                                  | Social Development                       | Other                                                                      |
|-------------------------|---------------------|------------------------------------------------------------------------------------------------------------------------------|--------------------------------------------------------------|--------------------------------------------------------------|------------------------------------------|----------------------------------------------------------------------------|
| One Health Stakeholders | Public sector       | Ministry of Agriculture, Livestock , Fisheries and Irrigation - State Department of Livestock- DVS , DLP and SAGAS ( MALF&I) | Ministry of Health(- MoH)                                    | Ministry of Environment and Forestry (ME&F)                  |                                          | Tegemeo Institute of Agricultural Policy & Development, Egerton University |
|                         |                     | Directorate of Veterinary Services (DVS)                                                                                     | Directorate of Veterinary Services (DVS)                     | National Environment Management Authority (NEMA)             |                                          | Kenya Bureau of Standards (KEBS)                                           |
|                         |                     | Kenya Agricultural and Livestock Research organization (KALRO)                                                               | County Governments                                           | Ministry of Lands and Physical Planning                      |                                          |                                                                            |
|                         |                     | Kenya Dairy Board (KDB)                                                                                                      | Pharmacy and Poisons Board of Kenya ( PPBK)                  | Kenya Plant Health Inspectorate Service -AMR issues (KEPHIS) |                                          |                                                                            |
|                         |                     | Kenya Veterinary Board (KVB)                                                                                                 | Kenya Plant Health Inspectorate Service -AMR issues (KEPHIS) |                                                              |                                          |                                                                            |
|                         |                     | Kenya Veterinary Medicine Directorate                                                                                        |                                                              |                                                              |                                          |                                                                            |
|                         |                     | County Governments                                                                                                           |                                                              |                                                              |                                          |                                                                            |
|                         |                     | Kenya Wildlife Service (KWS)                                                                                                 |                                                              |                                                              |                                          |                                                                            |
|                         |                     |                                                                                                                              |                                                              |                                                              |                                          |                                                                            |
|                         | Private sector      |                                                                                                                              |                                                              |                                                              |                                          |                                                                            |
|                         |                     | Kenya Poultry Breeders Association (KPBA)                                                                                    |                                                              |                                                              |                                          |                                                                            |
|                         |                     | Kenya Poultry Farmers Association (KPFA)                                                                                     |                                                              |                                                              |                                          |                                                                            |
|                         |                     | Association of Kenya feed manufacturers (AKEFEMA)                                                                            |                                                              |                                                              |                                          |                                                                            |
|                         |                     | Kenya Livestock Marketing Council (KLMC)                                                                                     |                                                              |                                                              |                                          |                                                                            |
|                         |                     | Kenya Livestock Producers Association (KLPA)                                                                                 |                                                              |                                                              |                                          |                                                                            |
|                         | International       | World Organization for Animal Health (OIE)                                                                                   | Centres for Diseases Control and Prevention (CDC Kenya )     |                                                              |                                          |                                                                            |
|                         |                     | Food and Agriculture Organization of the United Nations (FAO)                                                                | OHCEA                                                        |                                                              |                                          |                                                                            |
|                         |                     | One Health central and Eastern Africa (OHCEA)                                                                                | World health Organization (WHO)                              |                                                              |                                          |                                                                            |
|                         |                     | IGAD - ICPALD                                                                                                                | Africa Canfers for Diseases Control and Prevention (ACDC)    |                                                              |                                          |                                                                            |
|                         |                     |                                                                                                                              | FAO                                                          |                                                              |                                          |                                                                            |
|                         |                     | Donors (USAID, UKAid, EU and World Bank)                                                                                     | Donors (USAID, UKAid, EU and World Bank)                     | Donors (USAID, UKAid, EU and World Bank)                     | Donors (USAID, UKAid, EU and World Bank) |                                                                            |
|                         | NGOs                |                                                                                                                              | World Vision                                                 | World Vision                                                 | World Vision                             |                                                                            |
|                         |                     |                                                                                                                              |                                                              |                                                              |                                          |                                                                            |
|                         | Research / Academia | Colleges (Agriculture and Veterinary Sciences) - multiples                                                                   | Medical school- (FELTP) - multiples                          |                                                              |                                          |                                                                            |
|                         |                     | International Livestock Research Institute (ILRI).                                                                           | Kenya Medical Research Institute (KEMRI)                     |                                                              |                                          |                                                                            |
|                         |                     | KALRO                                                                                                                        |                                                              |                                                              |                                          |                                                                            |

NB: DLP = Directorate of Livestock Production, SAGAs = Semi-Autonomous Government Agencies, IGAD – ICPALD = Intergovernmental Authority on Development – IGAD Centre for Pastoral Areas and Livestock Development, USAID = United States Agency for International Development, UKAid = United Kingdom Aid Direct, EU = European Union.



**Supplementary material. (Sample questionnaire) Evaluation of the One Health Framework in Africa based on stakeholders' responsibilities and likely impact on overall One Health inputs and outputs.**

*Dear colleagues, the following stakeholders have been identified in the overall One Health implementation in Africa. To ensure correct stakeholder mapping using a semi-quantitative process, we appeal that you kindly fill this template. The outcome of the exercise will be published as an open access document for the use of all participants.*

Question 1: Kindly rank from 1=Lowest and 5=Highest

| No. | Stakeholder                                                                                    | Likely impact on One Health<br>(High/Moderate/Low) | Interest<br>score (1-5) | Influence<br>score (1-5) |
|-----|------------------------------------------------------------------------------------------------|----------------------------------------------------|-------------------------|--------------------------|
| 1.  | Associations of animal/animal product Producers, Traders and Processors                        |                                                    |                         |                          |
| 2.  | National research funding bodies                                                               |                                                    |                         |                          |
| 3.  | Department of Wildlife (Management and Research)                                               |                                                    |                         |                          |
| 4.  | Development partners (donors, consultants, collaborators etc)                                  |                                                    |                         |                          |
| 5.  | Veterinary field Officers working in holding grounds, livestock markets and quarantine station |                                                    |                         |                          |
| 6.  | Medical health care staff                                                                      |                                                    |                         |                          |
| 7.  | Public Financial Institutions                                                                  |                                                    |                         |                          |
| 8.  | Private Financial Institutions                                                                 |                                                    |                         |                          |
| 9.  | General Public                                                                                 |                                                    |                         |                          |
| 10. | Government Boards                                                                              |                                                    |                         |                          |
| 11. | Law enforcers (police, military, customs)                                                      |                                                    |                         |                          |
| 12. | Local governments                                                                              |                                                    |                         |                          |
| 13. | Livestock farmers                                                                              |                                                    |                         |                          |
| 14. | Local NGOs, CBOs, FBOs                                                                         |                                                    |                         |                          |
| 15. | Meat inspectors                                                                                |                                                    |                         |                          |
| 16. | Media (print, electronic)                                                                      |                                                    |                         |                          |
| 17. | Ministry of Health                                                                             |                                                    |                         |                          |
| 18. | Ministry of Livestock and Fisheries                                                            |                                                    |                         |                          |
| 19. | Ministry of Agriculture                                                                        |                                                    |                         |                          |
| 20. | Other Government Ministries (Ministry of Trade)                                                |                                                    |                         |                          |
| 21. | Politicians/Policy makers                                                                      |                                                    |                         |                          |
| 22. | Poultry hatcheries and breeder farms                                                           |                                                    |                         |                          |
| 23. | Commercial layers and broilers                                                                 |                                                    |                         |                          |
| 24. | Professional and Paraprofessional Associations                                                 |                                                    |                         |                          |
| 25. | Public and private veterinary laboratories                                                     |                                                    |                         |                          |
| 26. | Ranches (dairy and beef cattle farms)                                                          |                                                    |                         |                          |
| 27. | Regional economic communities                                                                  |                                                    |                         |                          |
| 28. | Small ruminants (sheep and goat) and pigs                                                      |                                                    |                         |                          |
| 29. | Regulatory bodies i.e. (Vet, Medical, Pharmacy, Others)                                        |                                                    |                         |                          |

|     |                                                                                                                                                                                                                                                                      |  |  |  |
|-----|----------------------------------------------------------------------------------------------------------------------------------------------------------------------------------------------------------------------------------------------------------------------|--|--|--|
| 30. | Research institutions (International, National, private, public)                                                                                                                                                                                                     |  |  |  |
| 31. | Public and private human Laboratories                                                                                                                                                                                                                                |  |  |  |
| 32. | Training institutions (public, private)                                                                                                                                                                                                                              |  |  |  |
| 33. | Input providers. Veterinary and medical pharmaceuticals, biological, reagents, chemicals and other inputs dealers<br>(a) Veterinary pharmaceuticals<br>(b) Medical pharmaceuticals<br>(c) Biological, vaccine & reagents<br>(d) Chemicals<br>(e) Feed & other inputs |  |  |  |
| 34. |                                                                                                                                                                                                                                                                      |  |  |  |
| 35. | <b>Others (list below and score)</b>                                                                                                                                                                                                                                 |  |  |  |
| 36. |                                                                                                                                                                                                                                                                      |  |  |  |

*Important definitions*

**1. Association of animal/animal product producers, traders and processors:**

*These are groups of people with a common goal and they deal in the business of capturing, slaughtering and sales of animals. They constitute themselves into a group for easy administration.*

**2. Government Boards:**

*This is a body with variable number of members constituted by the ruling government and charged mainly with supervisory roles over an agency or institution.*

**3. NGO (non-governmental organisations), CBO (Community Based Organisation), FBO (Faith Based Organisation):**

*NGOs are organisations with a defined memorandum and a mission statement. They are registered with the government of the country where they are established. They may be affiliated to an INGO (International Non-governmental organisations). CBO and FBO are sub-sets of NGO and are community based.*

**Question 2: Please provide a short response in a narrative to the two questions below:**

|    |                                                                                                                                                        |  |
|----|--------------------------------------------------------------------------------------------------------------------------------------------------------|--|
| 1) | What do you consider the weakest link in your country leading to a successful implementation of One Health approaches?<br>(comment box, max 50 words): |  |
| 2) | If you had 50,000 USD how would you best invest them towards One Health implementation in your country?<br>(comment box, max 200 words)                |  |

Question 3: List the ministries/institutions involved in OH activities & One Health Policy and implementation by institutional category and area of interest that you know.

|                         |                     | Livestock | Public Health | Environment | Social Development | Other |
|-------------------------|---------------------|-----------|---------------|-------------|--------------------|-------|
| One Health Stakeholders | Public sector       |           |               |             |                    |       |
|                         |                     |           |               |             |                    |       |
|                         |                     |           |               |             |                    |       |
|                         |                     |           |               |             |                    |       |
|                         |                     |           |               |             |                    |       |
|                         |                     |           |               |             |                    |       |
|                         |                     |           |               |             |                    |       |
|                         |                     |           |               |             |                    |       |
|                         | Private sector      |           |               |             |                    |       |
|                         |                     |           |               |             |                    |       |
|                         |                     |           |               |             |                    |       |
|                         |                     |           |               |             |                    |       |
|                         | International       |           |               |             |                    |       |
|                         |                     |           |               |             |                    |       |
|                         |                     |           |               |             |                    |       |
|                         |                     |           |               |             |                    |       |
|                         |                     |           |               |             |                    |       |
|                         |                     |           |               |             |                    |       |
|                         | NGOs                |           |               |             |                    |       |
|                         |                     |           |               |             |                    |       |
|                         |                     |           |               |             |                    |       |
|                         |                     |           |               |             |                    |       |
|                         | Research / Academia |           |               |             |                    |       |
|                         |                     |           |               |             |                    |       |
|                         |                     |           |               |             |                    |       |
|                         |                     |           |               |             |                    |       |

#### Question 4: Influence spheres on One Health

| No. | Institution                                              | Mean number of other stakeholders influenced (n) | One Health interest Score (0 – 10) | One Health Policy Power Score (0 – 10) |
|-----|----------------------------------------------------------|--------------------------------------------------|------------------------------------|----------------------------------------|
| 1.  | National Livestock Marketing Council (LMC)               |                                                  |                                    |                                        |
| 2.  | National Livestock Producers Association (LPA)           |                                                  |                                    |                                        |
| 3.  | Ministry of Agriculture and Forestry                     |                                                  |                                    |                                        |
| 4.  | Ministry of Livestock and Fisheries                      |                                                  |                                    |                                        |
| 5.  | Ministry of Environment (MoE)                            |                                                  |                                    |                                        |
| 6.  | National Environment Management Authority (NEMA)         |                                                  |                                    |                                        |
| 7.  | Ministry of Lands and Physical Planning (MLPP)           |                                                  |                                    |                                        |
| 8.  | Ministry of Health (MoH)                                 |                                                  |                                    |                                        |
| 9.  | Agricultural Universities/Faculties/Colleges             |                                                  |                                    |                                        |
| 10. | Medical Universities/Faculties/Colleges                  |                                                  |                                    |                                        |
| 11. | Directorate responsible for medicine control             |                                                  |                                    |                                        |
| 12. | National Medical Research Institute                      |                                                  |                                    |                                        |
| 13. | National Plant Health Inspectorate Service               |                                                  |                                    |                                        |
| 14. | National Poultry Farmers Association (PFA)               |                                                  |                                    |                                        |
| 15. | National Poultry Breeders Association (PBA)              |                                                  |                                    |                                        |
| 16. | National Association of Feed Manufacturers (FEMA)        |                                                  |                                    |                                        |
| 17. | African Union-IBAR                                       |                                                  |                                    |                                        |
| 18. | Regional Livestock Development Agencies/Organization     |                                                  |                                    |                                        |
| 19. | Africa Centers for Diseases Control and Prevention(ACDC) |                                                  |                                    |                                        |
| 20. | National Medical Board                                   |                                                  |                                    |                                        |
| 21. | National Veterinary Board (KVB)                          |                                                  |                                    |                                        |
| 22. | Ministry for Policy and Planning                         |                                                  |                                    |                                        |
| 23. | National Bureau of Standards (BS)                        |                                                  |                                    |                                        |
| 24. | Agricultural and Livestock Research Institute (KALRI)    |                                                  |                                    |                                        |
| 25. | Dairy Board (DB)                                         |                                                  |                                    |                                        |
| 26. | Livestock Meat Board                                     |                                                  |                                    |                                        |
| 27. | Pharmacy Board                                           |                                                  |                                    |                                        |
| 28. | FELTP/ISAVET (in-service epidemiology training)          |                                                  |                                    |                                        |

|     |                                                         |  |  |  |
|-----|---------------------------------------------------------|--|--|--|
| 29. | State/Province/County Authorities                       |  |  |  |
| 30. | Local Government/District Authorities                   |  |  |  |
| 31. | World Organization for Animal Health (OIE)              |  |  |  |
| 32. | Donors (e.g. USAID, UKAid, EU, World Bank, others)      |  |  |  |
| 33. | International Livestock Research Institute (ILRI)       |  |  |  |
| 34. | Wildlife Management Institution                         |  |  |  |
| 35. | Wildlife Research Institute/Service                     |  |  |  |
| 36. | Food and Agriculture organization (FAO)                 |  |  |  |
| 37. | International Livestock Research Institute              |  |  |  |
| 38. | Director of Veterinary Services (DVS)                   |  |  |  |
| 39. | Centers for Diseases Control and Prevention (CDC Kenya) |  |  |  |
| 40. | OHCEA: One Health Central and Eastern Africa            |  |  |  |
| 41. | World Health Organization (WHO)                         |  |  |  |
| 42. | World Organization for Animal Health (OIE)              |  |  |  |
| 43. | One Health Eastern and Central Africa (OHCEA)           |  |  |  |
| 44. | <b><i>Others (List below)</i></b>                       |  |  |  |
| 45. |                                                         |  |  |  |
